# Supplementary material
Source: Springer Nature journal article supplement (https://www.springermedizin.de/resource/supplementary/12874_2007_274_MOESM3_ESM.pdf/9434138)

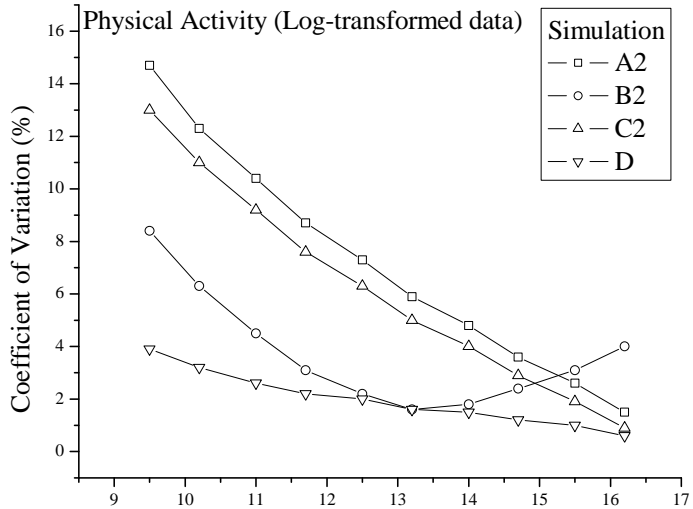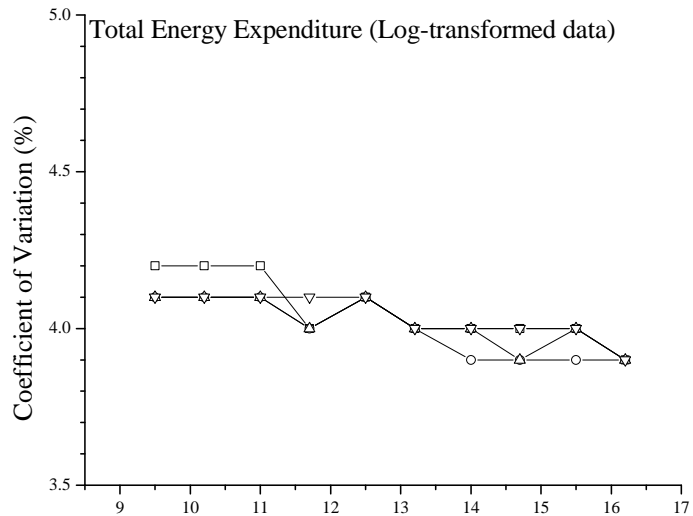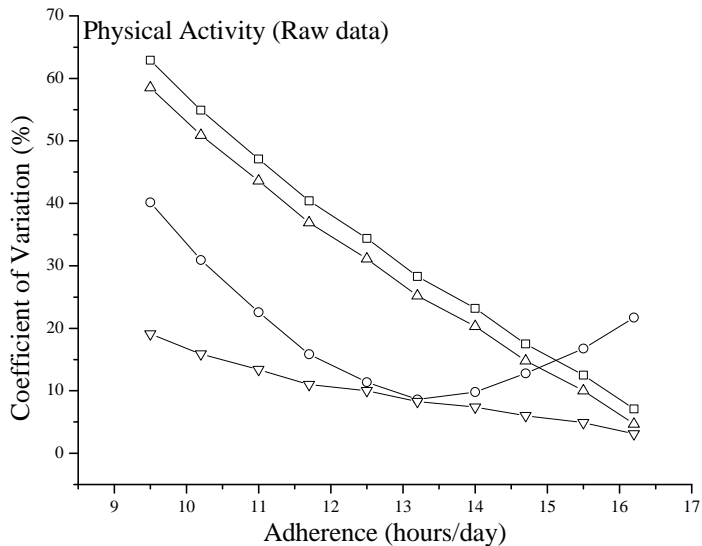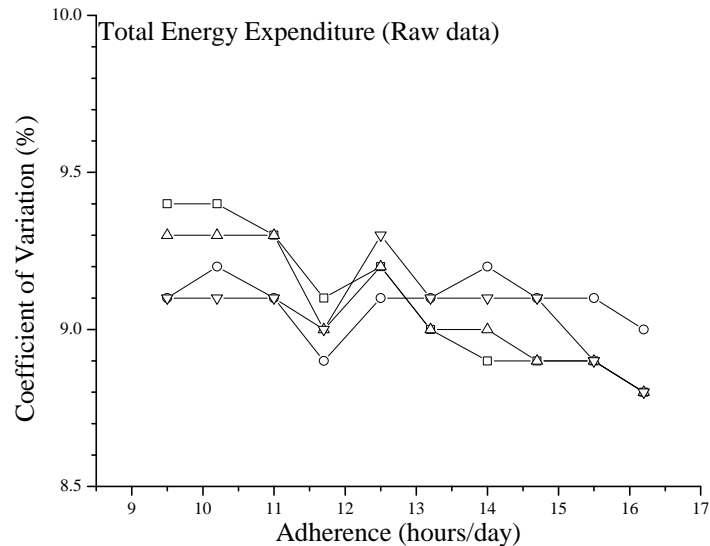

Supplement: MOESM3 [file 9434138]
